# Supplementary material for: Genome-Wide Characterization of Genetic Variation in the Unicellular, Green Alga Chlamydomonas reinhardtii
Source: PLoS One. 2012 Jul 25;7(7):e41307. doi: 10.1371/journal.pone.0041307 (PMC3405113; doi:10.1371/journal.pone.0041307)
Supplement: Table S1 — SNPs detected on each chromosome by functional category. (XLS) [file pone.0041307.s005.xls]

## Sheet: TableS1
	A. Detected SNPs					B. Invariant Bases					C. SNPs per Sequenced Base*
chromosome	cds	intergenic	intronic	3' utr	5' utr	cds	intergenic	intronic	3' utr	5' utr	cds	intergenic	intronic	3' utr	5' utr
1	2050	599	2233	803	1163	367311	140181	275044	97662	160894	0.00555013	0.00425487	0.00805332	0.00815518	0.00717649
2	1719	567	2185	701	1194	370646	172784	263700	94071	164796	0.00461644	0.00327082	0.00821784	0.0073967	0.0071932
3	1391	482	1928	542	1186	301127	131701	210120	73697	140386	0.00459807	0.00364646	0.00909228	0.00730074	0.00837736
4	292	102	447	158	274	66460	45325	45372	23452	33583	0.0043744	0.00224536	0.00975578	0.00669208	0.00809286
5	331	146	463	124	250	69846	64285	57608	20263	27621	0.00471665	0.00226599	0.007973	0.00608231	0.0089699
6	1396	684	1751	680	1068	322386	160263	227259	84613	156742	0.00431154	0.00424985	0.00764595	0.00797252	0.00676763
7	875	336	1157	365	702	188882	88577	145127	50483	97888	0.00461116	0.00377897	0.00790927	0.00717826	0.0071204
8	478	202	535	190	387	91759	74897	63679	30682	48602	0.0051823	0.00268978	0.00833152	0.00615444	0.00789973
9	732	235	1020	344	535	159304	79162	110529	43175	67000	0.00457397	0.00295981	0.00914396	0.00790459	0.00792182
10	1169	287	1567	488	913	258975	102983	176414	58532	104519	0.00449367	0.00277912	0.00880431	0.00826838	0.00865961
11	290	129	451	160	228	63189	63110	47474	18616	27881	0.00456844	0.00203988	0.00941054	0.00852152	0.00811128
12	1865	607	2357	826	1446	421344	153405	301858	94900	177030	0.00440681	0.00394125	0.00774781	0.00862879	0.00810193
13	947	422	1347	441	813	194774	93449	136807	49598	81662	0.00483852	0.00449553	0.00974999	0.00881313	0.00985753
14	394	184	489	195	339	84751	82065	48794	29927	36051	0.0046274	0.00223711	0.00992229	0.00647367	0.00931575
15	177	84	263	89	192	37799	117985	43406	12265	30711	0.00466084	0.000711448	0.00602258	0.00720414	0.00621299
16	1065	403	1455	523	886	237454	116052	171393	61277	115555	0.00446505	0.00346056	0.0084178	0.00846278	0.007609
17	989	494	1221	470	809	229938	85254	158068	59790	97387	0.00428274	0.00576107	0.00766531	0.00779954	0.00823862
Chromosome 15, which shows low nucleotide diversity, is highlighted in orange.
* Values in C were computed using the formula A/(A + B).
